# Supplementary material
Source: PubMed Central journal article supplement (PMC10530595)
Supplement: NIHMS1888961-supplement-suppl_material.pdf [file NIHMS1888961-supplement-suppl_material.pdf]

**Supplementary table 1:** Primer sequences used for real-time PCR detection of genes involved in lipid and glucose metabolism, hepatic xenobiotic metabolism, and inflammation.

| Gene                            | Primer orientation | Sequence 5'→3'           |
|---------------------------------|--------------------|--------------------------|
| <i>Pepck</i>                    | Forward Primer     | GATGACATTGCCTGGATGAA     |
|                                 | Reverse Primer     | AACCGTTTTCTGGGTTGATG     |
| <i>G6pase</i>                   | Forward Primer     | CTCACTTTCCCATCAGGTG      |
|                                 | Reverse Primer     | GAAAGTTTCAGCCACAGCAA     |
| <i>Gys</i>                      | Forward Primer     | CGTCAGAAAAGCTGTGGATG     |
|                                 | Reverse Primer     | AGCCATCTTCCAAAATGCAC     |
| <i>Pygl</i>                     | Forward Primer     | TCAATCAGAAGATCCGAGAAGG   |
|                                 | Reverse Primer     | AAGGGTTTCCATGCCTGAG      |
| <i>Cpt-1<math>\alpha</math></i> | Forward Primer     | ACAATGGGACATTCCAGGAG     |
|                                 | Reverse Primer     | AAAGACTGGCGCTGCTCA       |
| <i>Acox-1</i>                   | Forward Primer     | CACCTTCGAGGGAGAGAACA     |
|                                 | Reverse Primer     | CGCACCTGGTCGTAGATTTT     |
| <i>Srebp-1c</i>                 | Forward Primer     | CATGGATTGCACATTTGAAGAC   |
|                                 | Reverse Primer     | GCAGGAGAAGAGAAGCTCTCAG   |
| <i>Fasn</i>                     | Forward Primer     | GGCCACCTCAGTCCTGTTAT     |
|                                 | Reverse Primer     | AGGGTCCAGCTAGAGGGTACA    |
| <i>Scd-1</i>                    | Forward Primer     | CCTGTACGGGATCACACTGA     |
|                                 | Reverse Primer     | CCCAGGGCACTGATAAGGTA     |
| <i>F4/80</i>                    | Forward Primer     | GGACTTCTCCAAGCCTATCGT    |
|                                 | Reverse Primer     | CCTCTCAGACTTCTGCTTTGG    |
| <i>Tnfa</i>                     | Forward Primer     | TGAACTTCGGGGTGATCG       |
|                                 | Reverse Primer     | GGGCTTGTCACCTCGAGTTTT    |
| <i>IL-6</i>                     | Forward Primer     | CCTGGAGTTTGTGAAGAACAAC   |
|                                 | Reverse Primer     | GGAAGTTGGGGTAGGAAGGA     |
| <i>IL-1<math>\beta</math></i>   | Forward Primer     | TGTGATGAAAGACGGCACAC     |
|                                 | Reverse Primer     | CTTCTTCTTTGGGTATTGTTTGG  |
| <i>Cyp3a1</i>                   | Forward Primer     | GCAGGAGGAGATCGACAGG      |
|                                 | Reverse Primer     | CCAGGTATTCCATTTCCATCA    |
| <i>Cyp2b2</i>                   | Forward Primer     | GGGGAACCTCCTGCAGTT       |
|                                 | Reverse Primer     | GTGAACACATCTCCATATTTTTCG |
| <i>Cyp2c6</i>                   | Forward Primer     | CTCTGTTGCTCCTGCTGAAGTG   |
|                                 | Reverse Primer     | TGCCAACCACACGATCAATC     |
| <i>B-Actin</i>                  | Forward Primer     | CCCGCGAGTACAACCTTCT      |
|                                 | Reverse Primer     | CGTCATCCATGGCGAACT       |
